# Supplementary material for: Queens become workers: pesticides alter caste differentiation in bees
Source: PubMed Central journal article supplement (PMC4987680; doi:10.1038/srep31605), 2016-08-17
Supplement: srep31605-s1.pdf [file srep31605-s1.pdf]

## Supplementary Information

### **Queens become workers: pesticides alter caste differentiation in bees**

Charles F. dos Santos<sup>1\*</sup>, André L. Acosta<sup>2,3</sup>, Andressa L. Dorneles<sup>1</sup>, Patrick D. S. dos Santos<sup>1</sup>,  
Betina Blochtein<sup>1,4‡</sup>

<sup>1</sup>Departamento de Biodiversidade e Ecologia, Faculdade de Biociências, Pontifícia Universidade Católica do Rio Grande do Sul, Av. Ipiranga, 6681, 90619-900, Porto Alegre, RS, Brazil;

<sup>2</sup>Departamento de Ecologia, Universidade de São Paulo, Rua do Matão, 321, Travessa 14, 05508-090 São Paulo, SP, Brazil. <sup>3</sup>Núcleo de Pesquisa em Biodiversidade e Computação - BioComp. Escola Politécnica, Av. Prof. Luciano Gualberto, Trav. 3, n. 380, 05508-010 São Paulo, São Paulo, Brazil;

<sup>4</sup>Instituto do Meio Ambiente, Pontifícia Universidade Católica do Rio Grande do Sul, Av. Ipiranga, 6681, 90619-900, Porto Alegre, RS, Brazil.

Correspondence to: [\\*charles.santos@puers.br](mailto:*charles.santos@puers.br), [‡betinabl@puers.br](mailto:‡betinabl@puers.br)

**Supplementary Table S1. Lethal and sub-lethal effects of xenobiotics on queen bees.** † – Pesticide or fungicide (Pristine®) alones or both them; ‡ – Deformed wing virus; <sup>Ω</sup> – Pesticides plus parasites (*Crithidia bombi*); <sup>Φ</sup> – Control of fungal diseases on plants; NA – Not applicable.

| Sociality level           | Bee species              | Classes                 | Pesticides (common names)                  | Target tissue or organ in insects                                                          | Lethal and sublethal effects                  | Ref. |
|---------------------------|--------------------------|-------------------------|--------------------------------------------|--------------------------------------------------------------------------------------------|-----------------------------------------------|------|
| Highly eusocial bees      | <i>Apis mellifera</i>    | Carbamate;<br>Benzamide | Fenoxycarb;<br>Diflubenzuron               | Mimics juvenile hormone; inhibits the production of chitin; interferes with larval molting | Fault mating and affected egg laying          | 1    |
|                           |                          | Neonicotinoid           | Imidacloprid                               | Neurotoxin which act on the central nervous system                                         | Mortality in the midgut columnar cells        | 2    |
|                           |                          | Neonicotinoid           | Thiamethoxam,<br>Clothianidin              | Neurotoxin which act on the central nervous system                                         | Higher queen supersedure                      | 3    |
|                           |                          | Organophosphate         | Chlorpyrifos                               | Neurotoxic for insects by inhibiting acetylcholinesterase                                  | Mortality during pupate or pupae phases       | 4†   |
|                           |                          | Organophosphate         | Chlorpyrifos                               | Neurotoxic for insects by inhibiting acetylcholinesterase                                  | Higher susceptibility to viruses <sup>‡</sup> | 4†   |
|                           |                          |                         |                                            |                                                                                            |                                               |      |
|                           | <i>Plebeia droryana</i>  | Organophosphate         | Chlorpyrifos                               | Neurotoxic for insects by inhibiting acetylcholinesterase                                  | Higher mortality queen larvae                 | Here |
|                           |                          | Organophosphate         | Chlorpyrifos                               | Neurotoxic for insects by inhibiting acetylcholinesterase                                  | Skewed caste differentiation                  | Here |
| Primitively eusocial bees | <i>Bombus terrestris</i> | Neonicotinoid           | Imidacloprid                               | Neurotoxin which act on the central nervous system                                         | Reduced queen production                      | 5    |
|                           |                          | Neonicotinoid           | Imidacloprid                               | Neurotoxin which act on the central nervous system                                         | Decreasing brood production                   | 6    |
|                           |                          | Neonicotinoid           | Thiamethoxam,<br>Clothianidin <sup>Ω</sup> | Neurotoxin which act on the central nervous system                                         | Low survival                                  | 7    |
|                           |                          |                         |                                            |                                                                                            |                                               |      |
|                           | <i>Bombus impatiens</i>  | Neonicotinoid           | Thiamethoxam,<br>Clothianidin              | Neurotoxin which act on the central nervous system                                         | Higher mortality                              | 8    |
|                           |                          | NA                      | Chlorothalonil <sup>Φ</sup>                | NA                                                                                         | Smaller queens                                | 9    |

**Supplementary Table S2. Chlorpyrifos traces that were found in floral resources.**

Available data only from the pollen and nectar harvested and/or stored by honeybees and bumblebees. N = sample size; All measures of dispersion in µg/µL.

| <b>BEEES</b>  |                                     |             |             |               |             |                 |                   |
|---------------|-------------------------------------|-------------|-------------|---------------|-------------|-----------------|-------------------|
| <b>N</b>      | <b>Positive samples (frequency)</b> | <b>Min.</b> | <b>Max.</b> | <b>Median</b> | <b>Mean</b> | <b>SD or SE</b> | <b>References</b> |
| --            | --                                  | --          | 5.7E-05     | --            | --          | --              | 10                |
| 140           | 12 (8.6%)                           | 1.0E-06     | 1.1E-05     | 2.2E-06       | 3.4E-06     | --              | 11                |
| --            | --                                  | --          | 8.1E-05     | --            | --          | 2.7E-05 (SE)    | 4                 |
| --            | --                                  | --          | 7.3E-05     | --            | --          | 3.3E-05 (SE)    | 4                 |
| 16            | 1 (6.2%)                            | 3.3E-05     | 3.3E-05     | 3.3E-05       | 3.3E-05     | --              | 12                |
| 18            | 1 (5.5%)                            | 3.1E-05     | 3.1E-05     | 3.1E-05       | 3.1E-05     | --              | 12                |
| <b>POLLEN</b> |                                     |             |             |               |             |                 |                   |
| <b>N</b>      | <b>Positive samples (frequency)</b> | <b>Min.</b> | <b>Max.</b> | <b>Median</b> | <b>Mean</b> | <b>SD or SE</b> | <b>References</b> |
| 448           | 10 (2.2%)                           | 3.0E-06     | 2.9E-04     | --            | 9.5E-05     | --              | 13                |
| 397           | 10 (2.5%)                           | 4.0E-06     | 2.8E-04     | --            | 8.7E-05     | --              | 13                |
| 92            | 6 (6.5%)                            | 4.0E-06     | 1.8E-04     | --            | 3.3E-05     | --              | 13                |
| 84            | 4 (4.8%)                            | 5.0E-06     | 8.7E-05     | --            | 3.4E-05     | --              | 13                |
| --            | --                                  | --          | 8.3E-04     | --            | --          | --              | 10                |
| 350           | 153 (43.7%)                         | 1.0E-07     | 8.3E-04     | 4.4E-06       | 5.3E-05     | --              | 11                |
| 198           | 1 (0.5%)                            | 3.5E-05     | 3.5E-05     | --            | 3.5E-05     | --              | 14                |
| --            | --                                  | --          | 9.7E-04     | --            | --          | 1.2E-05 (SE)    | 4                 |
| --            | --                                  | --          | 9.4E-04     | --            | --          | 3.5E-05 (SE)    | 4                 |
| --            | 7                                   | --          | 1.6E-05     | --            | 3.1E-06     | 1.1E-06 (SE)    | 15                |
| 313           | 14 (4.50%)                          | 2.0E-06     | 2.5E-05     | 4.4E-06       | 6.8E-06     | 6.2E-06 (SD)    | 16                |
| 14            | 1 (7.1%)                            | 2.4E-05     | 2.4E-05     | 2.4E-05       | 2.4E-05     | --              | 12                |
| 17            | 11 (64.7%)                          | 4.1E-06     | 7.2E-05     | 1.3E-05       | 2.6E-05     | --              | 12                |
| <b>HONEY</b>  |                                     |             |             |               |             |                 |                   |
| <b>N</b>      | <b>Positive samples (frequency)</b> | <b>Min.</b> | <b>Max.</b> | <b>Median</b> | <b>Mean</b> | <b>SD or SE</b> | <b>References</b> |
| --            | --                                  | --          | 1.5E-05     | --            | --          | --              | 10                |
| 31            | 13 (41.9%)                          | 3.0E-05     | 8.0E-05     | --            | 4.6E-05     | 1.2E-05 (SD)    | 17                |
| 20            | 1 (5%)                              | 3.3E-06     | 3.3E-06     | 3.3E-06       | 3.3E-06     | --              | 12                |
| <b>BEEWAX</b> |                                     |             |             |               |             |                 |                   |
| <b>N</b>      | <b>Positive samples (frequency)</b> | <b>Min.</b> | <b>Max.</b> | <b>Median</b> | <b>Mean</b> | <b>SD or SE</b> | <b>References</b> |
| 47            | 3 (7.3%)                            | 7.1E-06     | 1.9E-05     | --            | 1.5E-05     | --              | 18                |
| --            | --                                  | --          | 8.9E-04     | --            | --          | --              | 10                |
| 258           | 163 (63.2%)                         | 1.0E-06     | 8.9E-04     | 4.3E-06       | 2.5E-05     | --              | 11                |
| 87            | 3 (3.5%)                            | 7.1E-06     | 1.9E-05     | --            | 1.5E-05     | --              | 14                |
| 13            | 8 (62%)                             | 3.0E-06     | 1.5E-05     | --            | 8.0E-06     | --              | 19                |

**Supplementary Table S3. Log-rank test & Bonferroni adjusted results.** *P*-value adjustment method for pairwise comparisons: Bonferroni

| <b>Log-rank Test</b>                                                                            |         |         |          |          |           |           |
|-------------------------------------------------------------------------------------------------|---------|---------|----------|----------|-----------|-----------|
| survdifff(formula = Surv(Time, Occurrence) ~ Treatments, data = Larvae.Survival.Total, rho = 0) |         |         |          |          |           |           |
| $\chi^2 = 119$ , d.f. = 6, $P < 0.001$                                                          |         |         |          |          |           |           |
|                                                                                                 |         | N       | Observed | Expected | (O-E)^2/E | (O-E)^2/V |
| Treatments=0.0088                                                                               | 63      | 24      | 58.3     | 20.20    | 27.10     |           |
| Treatments=0.0176                                                                               | 63      | 36      | 49.6     | 3.75     | 4.73      |           |
| Treatments=0.0264                                                                               | 63      | 50      | 33.5     | 8.18     | 9.65      |           |
| Treatments=0.0352                                                                               | 63      | 51      | 38.9     | 3.74     | 4.51      |           |
| Treatments=0.0440                                                                               | 63      | 54      | 37.4     | 7.32     | 8.91      |           |
| Treatments=0.0880                                                                               | 63      | 62      | 26.8     | 46.19    | 53.76     |           |
| Treatments=control                                                                              | 63      | 15      | 47.4     | 22.14    | 28.18     |           |
| <b>Pairwise comparisons using <i>t</i> tests with pooled SD</b>                                 |         |         |          |          |           |           |
| data: Occurrence and Treatments                                                                 |         |         |          |          |           |           |
|                                                                                                 | 0.0088  | 0.0176  | 0.0264   | 0.0352   | 0.0440    | 0.0880    |
| 0.0176                                                                                          | 0.1734  | -       | -        | -        | -         | -         |
| 0.0264                                                                                          | 3.6e-07 | 0.0439  | -        | -        | -         | -         |
| 0.0352                                                                                          | 1.0e-07 | 0.0207  | 1.0000   | -        | -         | -         |
| 0.0440                                                                                          | 2.1e-09 | 0.0017  | 1.0000   | 1.0000   | -         | -         |
| 0.0880                                                                                          | 1.3e-14 | 3.6e-07 | 0.1734   | 0.3235   | 1.0000    | -         |
| control                                                                                         | 0.9913  | 9.5e-05 | 1.5e-12  | 3.2e-13  | 2.6e-15   | < 2e-16   |

**Supplementary Table S4. Quantitative and qualitative factors causing failure in queen production due to exposure to pesticides.** Estimated amount of larval food consumed and subsequent expected amount of chlorpyrifos residuals ingested by would-be queen larvae becoming workers.

| <b>Amount of larval food offered</b>        | <b>Estimated food range consumed</b><br>$\frac{1}{3}$ to $\frac{2}{3}$                                          |            | <b>Mean <math>\pm</math> Std.dev.</b>                           |
|---------------------------------------------|-----------------------------------------------------------------------------------------------------------------|------------|-----------------------------------------------------------------|
| 66 $\mu$ L                                  | 22 $\mu$ L                                                                                                      | 44 $\mu$ L | 31.55 $\mu$ L $\pm$ 0.97                                        |
| <b>Treatments</b><br>( $\mu$ g a.i./ larva) | <b>Estimated dose range from <math>\frac{1}{3}</math> to <math>\frac{2}{3}</math></b><br>( $\mu$ g a.i./ larva) |            | <b>Mean <math>\pm</math> Std.dev.</b><br>( $\mu$ g a.i./ larva) |
| 0.0088                                      | 0.0029                                                                                                          | 0.00587    | 0.003876 $\pm$ 1.80e-04                                         |
| 0.0176                                      | 0.0059                                                                                                          | 0.01173    | 0.008853 $\pm$ 6.30e-04                                         |
| 0.0264                                      | 0.0088                                                                                                          | 0.0176     | 0.01373 $\pm$ 8.400e-04                                         |
| 0.0352                                      | 0.0117                                                                                                          | 0.02347    | 0.01721 $\pm$ 1.260e-03                                         |
| 0.0440                                      | 0.0147                                                                                                          | 0.02933    | 0.02525 $\pm$ 1.590e-03                                         |
| 0.0880                                      | 0.0293                                                                                                          | 0.05867    | 0.04077 $\pm$ 0.000                                             |

**Supplementary Table S5. Development duration.** The Kruskal-Wallis test for multiple comparisons among bees yielded “normal” queens (control) and chlorpyrifos-exposed queens and workers (pesticide bioassays). Note: *P*-value adjustment method for pairwise comparisons: Benjamini-Hochberg; Bold numbers indicate the test value; Asterisks indicate statistically significant at 0.001 level.

| <b>Kruskal-Wallis: <math>\chi^2= 83.9584</math>, d.f. = 2, <math>P &lt; 0.001</math></b> |                            |                            |
|------------------------------------------------------------------------------------------|----------------------------|----------------------------|
|                                                                                          | <b>contaminated worker</b> | <b>contaminated queens</b> |
| <b>contaminated queens</b>                                                               | <b>2.988602</b>            |                            |
|                                                                                          | 0.0014*                    |                            |
| <b>control queens</b>                                                                    | <b>8.897366</b>            | <b>6.417743</b>            |
|                                                                                          | 0.0000*                    | 0.0000*                    |

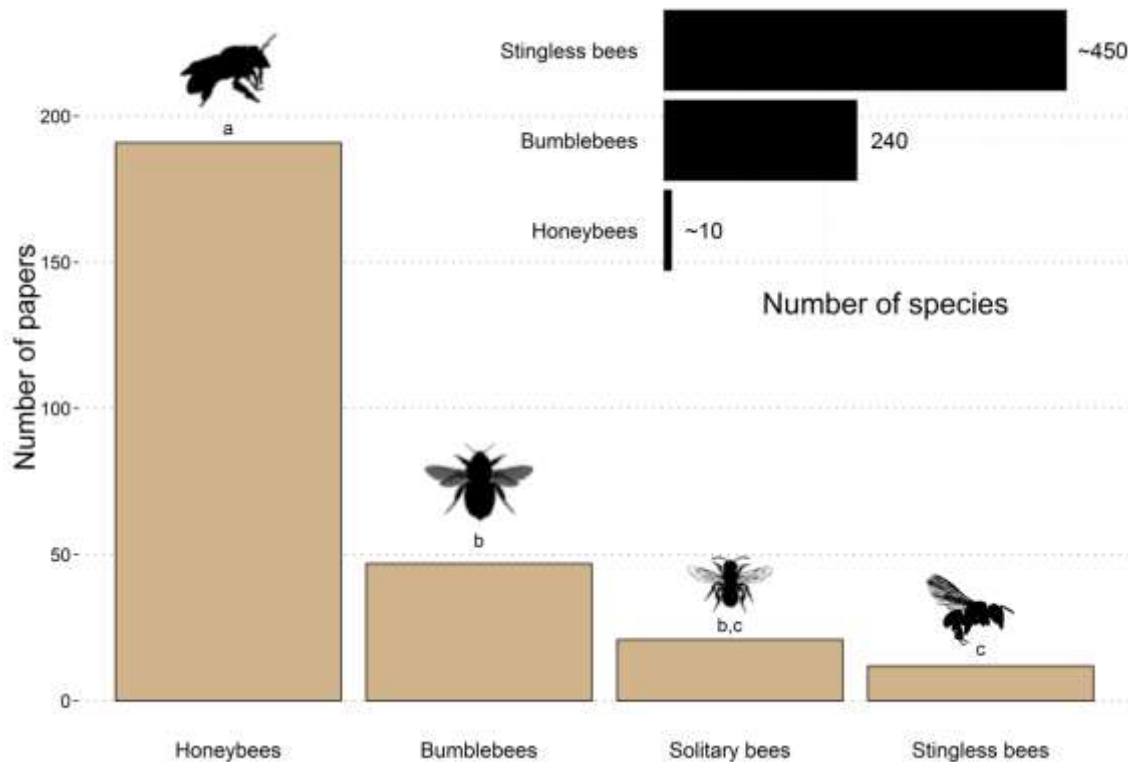

**Supplementary Figure S1. Research efforts and/or scientific concerns regarding pesticide effects on bees.** Source: Web of Science™ (January 01, 2014, to September 26, 2015). Kruskal-Wallis,  $\chi^2 = 117.8$ , d.f. = 3,  $P < 0.001$ . Different letters mean a significant difference according to *post hoc* Dunn's test with the Benjamini-Hochberg adjustment. Smaller chart: Amount of eusocial bee species. Note: The bumblebee silhouette was drawn by Melissa Broussard which is shared via PhyloPic project ([www.phylopic.org](http://www.phylopic.org)). It is available for use/reuse under the Creative Commons Attribution-ShareAlike 3.0 Unported license (<http://creativecommons.org/licenses/by/3.0/>). Honeybee and solitary bee silhouettes are available for use/reuse under the Public Domain Dedication 1.0 license (retrieved from [www.phylopic.org](http://www.phylopic.org)); Stingless bee silhouette from author's archive.

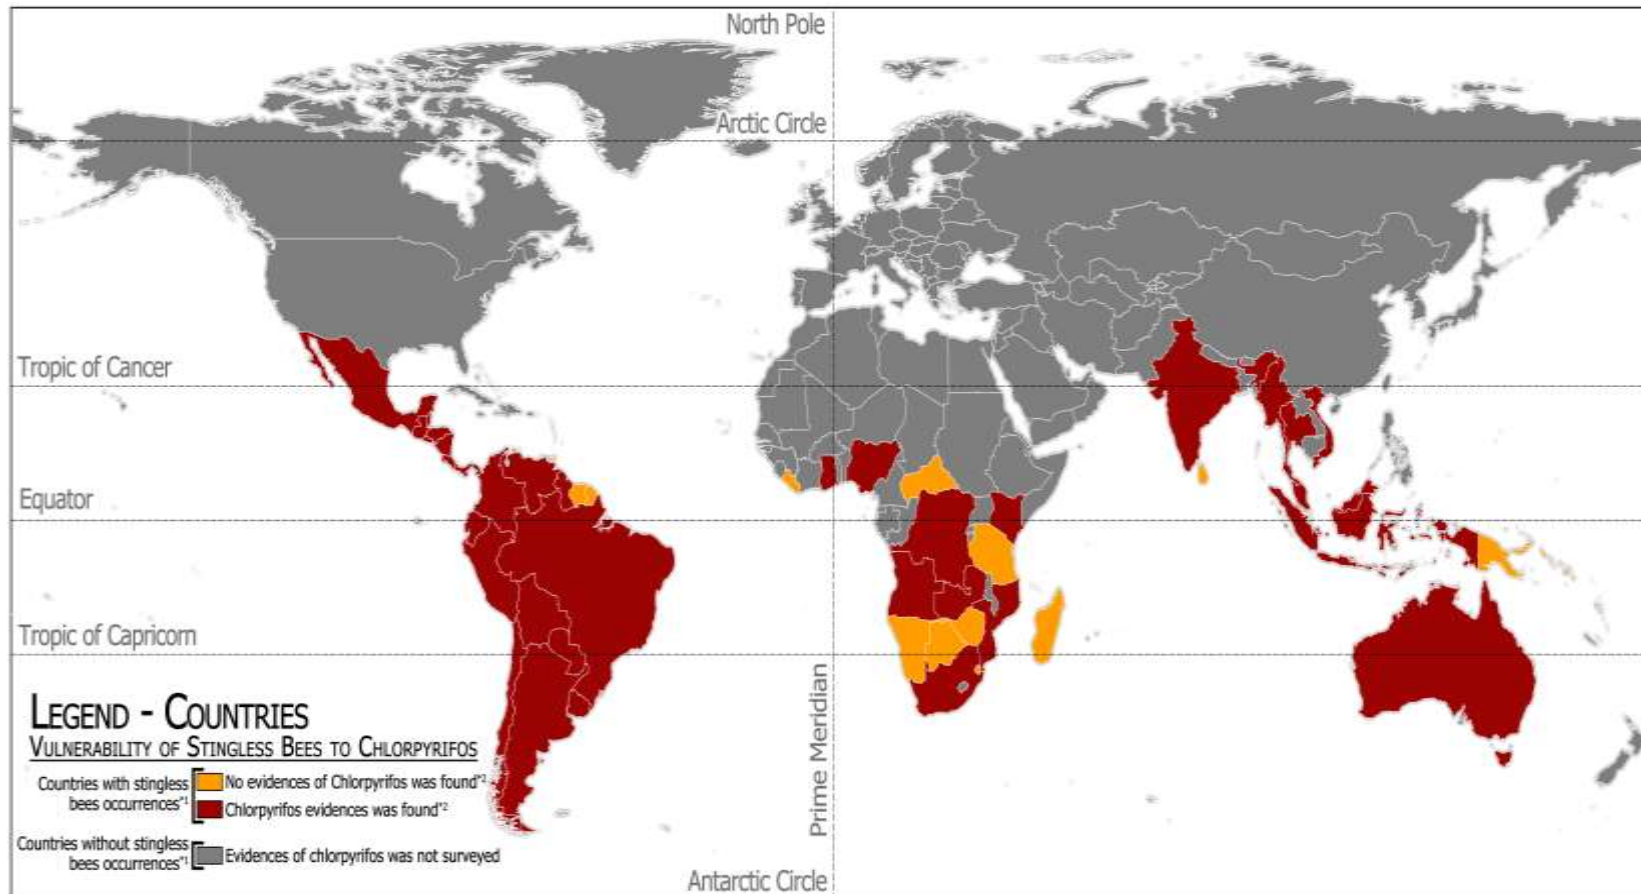

**Supplementary Figure S2. Countries with possible vulnerability of stingless bee populations to chlorpyrifos (CPY).** Data were plotted according to natural occurrence of stingless bees across countries' administrative areas where CPY (48% a.i. or similar concentrations) is commercialised and/or used for crops. Note: This map was built using Geographic Information Systems ArcGIS software, version 9.3 (Esri Inc., 2010;[www.esri.com](http://www.esri.com)).



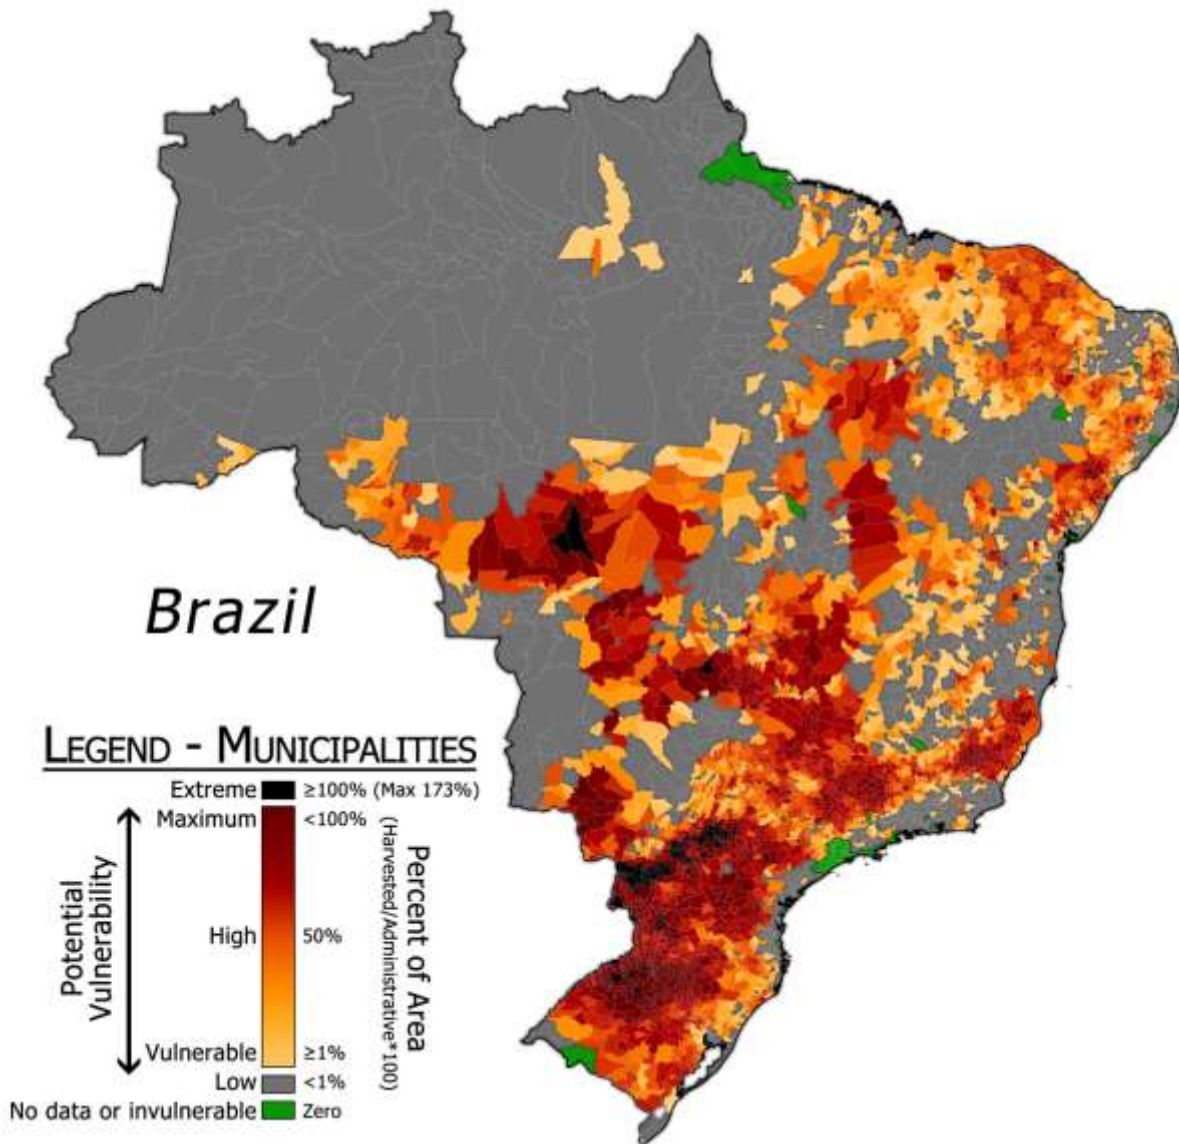

**Supplementary Figure S3. Potential vulnerability of Brazilian stingless bee populations to chlorpyrifos (CPY).** Brazilian municipalities' administrative areas where Lorsban® (480BR, 48% a.i., Dow AgroSciences, Brazil) is indicated for crops mentioned in the Methods, sub-item Brazil scale map. Note: This map was built using Geographic Information Systems ArcGIS software, version 9.3 (Esri Inc., 2010; [www.esri.com](http://www.esri.com)). Note: The sum of the harvested area per year at some municipalities exceeds its administrative area because some crops are harvested more than once a year.

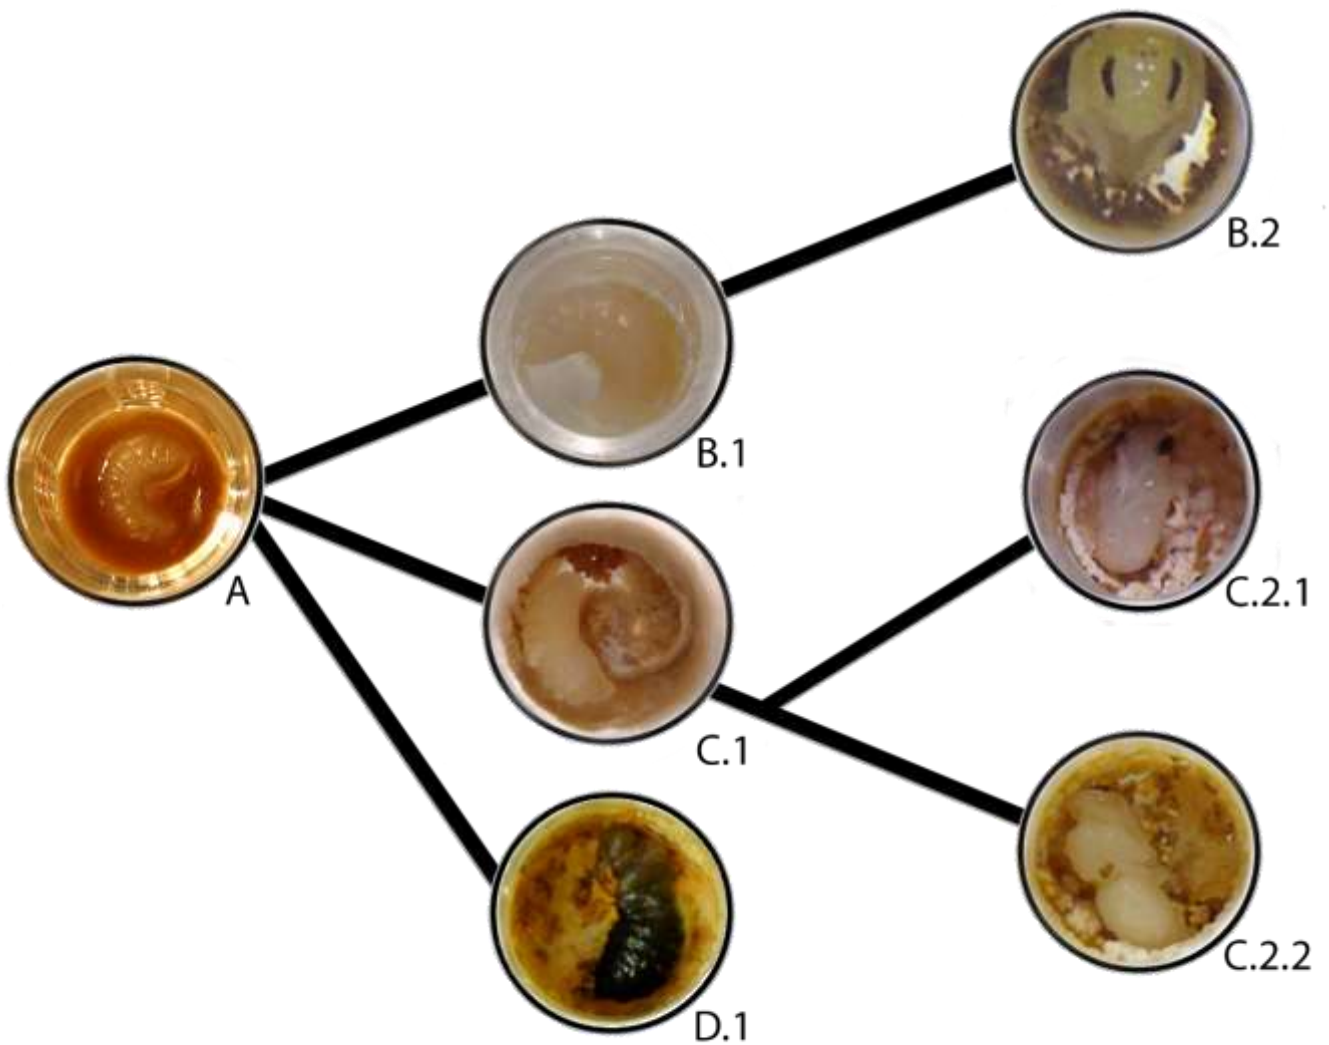

**Supplementary Figure S4. Lethal and sublethal effects of chlorpyrifos.** A – Feeding larva on liquid food; B.1 – Potential queen larva with nearly all food consumed; B.2 – Queen pupa surrounded by faeces; C.1 – Potential worker larva surrounded by faeces and waste food; C.2.1 – Worker pupa with ca.  $\frac{2}{3}$  of larval food consumed; C.2.2 – Worker pupa with ca.  $\frac{1}{3}$  of larval food consumed; D.1 – Dead pupa with largely darkened abdominal region. Images from author's archive.

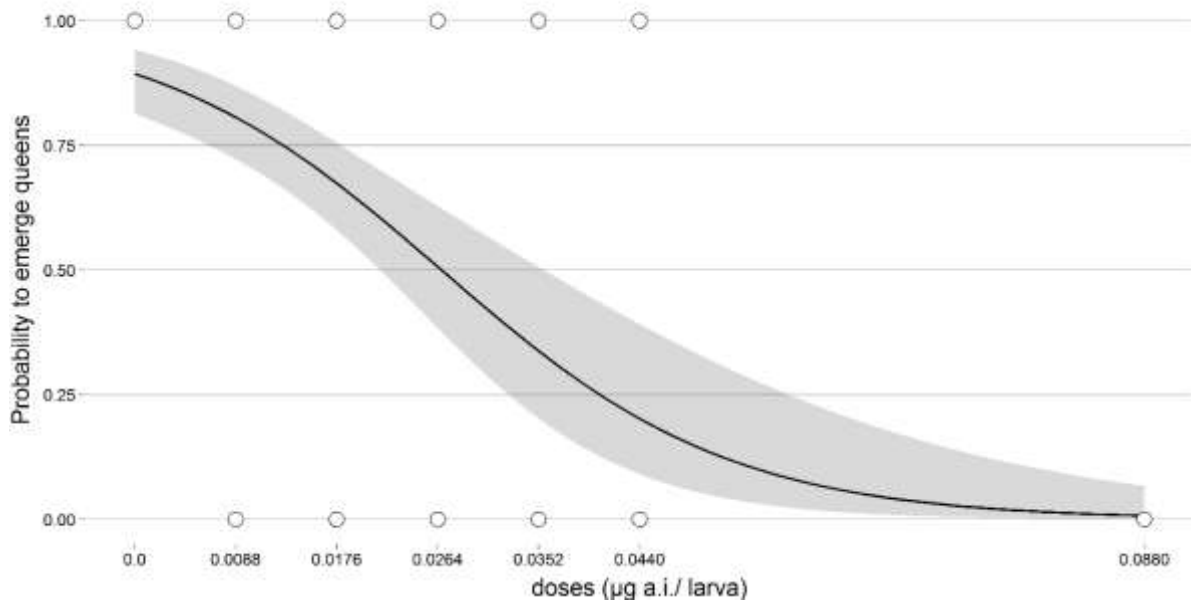

**Supplementary Figure S5. Probability of emergence of queens.** The chances of *Plebeia droryana* larvae to differentiate into a queen as a function of the dose of chlorpyrifos (CPY) in larval food. The binary logistic regression model (logit link) is shown. Legend: ○, observed data; —, the predicted model; shaded area, 95% confidence interval (generalised linear mixed model [GLMM] Binomial, P = 0.009).

Posterior legs of workers and queens

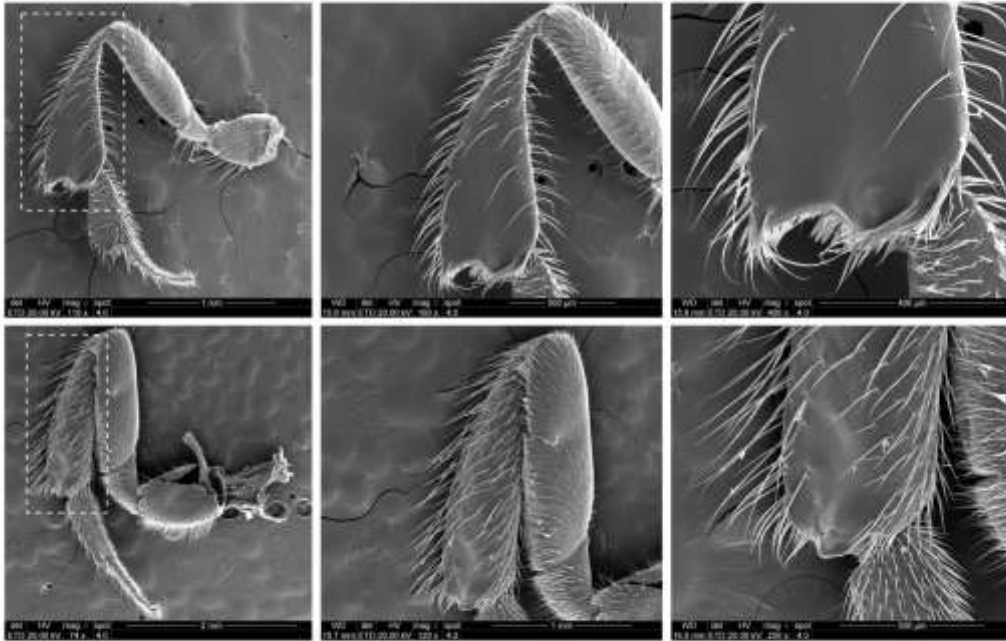

**Supplementary Figure S6. Scanning electron microscopy of the posterior legs of *Plebeia droryana* workers and queens.** Workers have wider and convex tibiae (top) that help them to carry pollen grains, resin, and other materials, whereas queens (bottom) lack this structure.

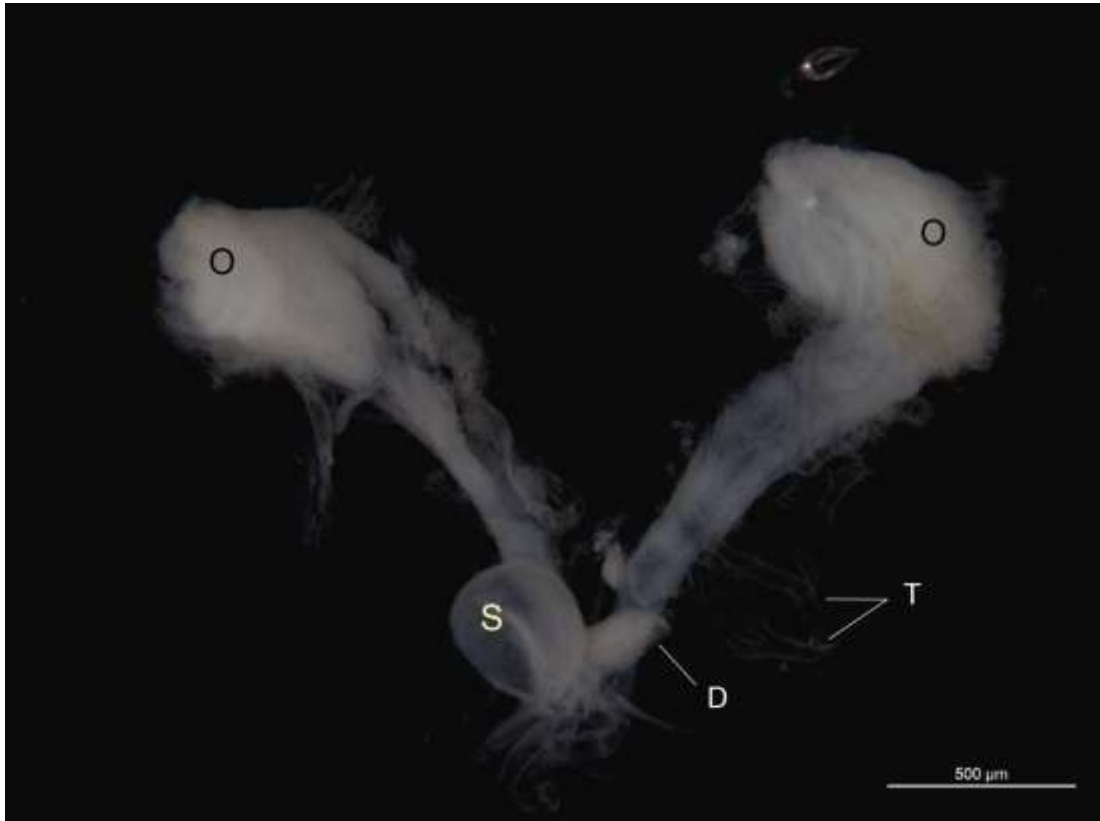

**Supplementary Figure S7. Reproductive tract of *Plebeia droryana* queens.** Legend: O, ovaries; T, Trachea; S, Spermatheca; D, Dufour's gland. Note: Worker bees do not have well-developed ovaries neither they possess spermathecal reservoir.

## Supplementary references

- S1. Thompson, H. M., Wilkins, S., Battersby, A. H., Waite, R. J. & Wilkinson, D. The effects of four insect growth-regulating (IGR) insecticides on honeybee (*Apis mellifera* L.) colony development, queen rearing and drone sperm production. *Ecotoxicology* **14**, 757–769 (2005).
- S2. Gregorc, A. & Ellis, J. D. Cell death localization in situ in laboratory reared honey bee (*Apis mellifera* L.) larvae treated with pesticides. *Pestic. Biochem. Physiol.* **99**, 200–207 (2011).
- S3. Sandrock, C. *et al.* Impact of chronic neonicotinoid exposure on honeybee colony performance and queen supersedure. *PLoS One* **9**, e103592 (2014).
- S4. DeGrandi-Hoffman, G., Chen, Y. & Simonds, R. The effects of pesticides on queen rearing and virus titers in honey bees (*Apis mellifera* L.). *Insects* **4**, 71–89 (2013).
- S5. Whitehorn, P. R., O'Connor, S., Wackers, F. L. & Goulson, D. Neonicotinoid pesticide reduces bumble bee colony growth and queen production. *Science* **336**, 351–352 (2012).
- S6. Laycock, I. & Cresswell, J. E. Repression and recuperation of brood production in *Bombus terrestris* bumble bees exposed to a pulse of the neonicotinoid pesticide imidacloprid. *PLoS One* **8**, e79872 (2013).
- S7. Fauser-Misslin, A., Sadd, B. M., Neumann, P. & Sandrock, C. Influence of combined pesticide and parasite exposure on bumblebee colony traits in the laboratory. *J. Appl. Ecol.* **51**, 450–459 (2014).
- S8. Scholer, J. & Krischik, V. Chronic exposure of imidacloprid and clothianidin reduce queen survival, foraging, and nectar storing in colonies of *Bombus impatiens*. *PLoS One* **9**, e91573 (2014).
- S9. Bernauer, O., Gaines-Day, H. & Steffan, S. Colonies of bumble bees (*Bombus impatiens*) produce fewer workers, less bee biomass, and have smaller mother queens following fungicide exposure. *Insects* **6**, 478–488 (2015).
- S10. Johnson, R. M., Ellis, M. D., Mullin, C. A. & Frazier, M. Pesticides and honey bee toxicity – USA. *Apidologie* **41**, 312–331 (2010).
- S11. Mullin, C. A. *et al.* High levels of miticides and agrochemicals in North American apiaries: implications for honey bee health. *PLoS One* **5**, e9754 (2010).
- S12. Al Naggar, Y. *et al.* Organophosphorus insecticides in honey, pollen and bees (*Apis mellifera* L.) and their potential hazard to bee colonies in Egypt. *Ecotoxicol. Environ. Saf.* **114**, 1–8 (2015).
- S13. Bernal, J. *et al.* Overview of pesticide residues in stored pollen and their potential effect on bee colony (*Apis mellifera*) losses in Spain. *J. Econ. Entomol.* **103**, 1964–1971 (2010).
- S14. Chauzat, M. P. *et al.* An assessment of honeybee colony matrices, *Apis mellifera* (Hymenoptera: Apidae) to monitor pesticide presence in continental France. *Environ. Toxicol. Chem.* **30**, 103–111 (2011).
- S15. Pettis, J. S. *et al.* Crop pollination exposes honey bees to pesticides which alters their susceptibility to the gut pathogen *Nosema ceranae*. *PLoS One* **8**, e70182 (2013).
- S16. Stoner, K. A. & Eitzer, B. D. Using a hazard quotient to evaluate pesticide residues detected in pollen trapped from honey bees (*Apis mellifera*) in Connecticut. *PLoS One* **8**, e77550 (2013).
- S17. Pareja, L. *et al.* Detection of pesticides in active and depopulated beehives in Uruguay. *Int. J. Environ. Res. Public Health* **8**, 3844–3858 (2011).
- S18. Chauzat, M.-P. & Faucon, J.-P. Pesticide residues in beeswax samples collected from honey bee colonies (*Apis mellifera* L.) in France. *Pest Manag. Sci.* **63**, 1100–1106 (2007).
- S19. Wu, J. Y., Anelli, C. M. & Sheppard, W. S. Sub-lethal effects of pesticide residues in brood comb on worker honey bee (*Apis mellifera*) development and longevity. *PLoS One* **6**, e14720 (2011).
